# Supplementary material for: Excited-state prototropism of 7-hydroxy-4-methylcoumarin in [Cnmim][BF4] series of ionic liquid–water mixtures: insights on reverse micelle-like water nanocluster formation
Source: Royal Society of Chemistry journal article supplement (doi:10.1039/c8pp00132d), 2018-08-01
Supplement: c8pp00132d1.pdf [file c8pp00132d1.pdf]

## Electronic Supplementary Information

### **Excited-State Prototropism of 7-Hydroxy-4-methylcoumarin in [C<sub>n</sub>mim][BF<sub>4</sub>] Series of Ionic Liquid-Water Mixtures: Insights on Reverse Micelle-like Water Nanocluster Formation**

Vijay Beniwal,<sup>a</sup> Anil Kumar,<sup>a</sup> Haridas Pal,<sup>b,c,\*</sup> and Sharmistha Dutta Choudhury,<sup>b,c,\*</sup>

<sup>a</sup> *Physical and Materials Chemistry Division, CSIR-National Chemical Laboratory, H. J. Bhabha Road, Pune-411 008, India.*

<sup>b</sup> *Radiation & Photochemistry Division, Bhabha Atomic Research Centre, Mumbai 400 085, India. E-mail: hpal@barc.gov.in and sharmidc@barc.gov.in.*

<sup>c</sup> *Home Bhabha National Institute, Training School Complex, Anushaktinagar, Mumbai 400 094, India.*

#### **Note S1: Materials, Synthesis and <sup>1</sup>H NMR of the [C<sub>n</sub>mim][BF<sub>4</sub>] series of ionic liquids**

##### **Materials:**

The chemicals, 1-methylimidazole, bromoethane, 1-bromobutane, 1-bromohexane, 1-bromooctane and 1-bromodecane were purchased from Sigma Aldrich and were distilled prior to use. Sodium tetrafluoroborate salt was used as obtained from Sigma Aldrich.

##### **Synthesis of the ionic liquids:**

The synthesis of the 1-alkyl-3-methylimidazolium tetrafluoroborate ([C<sub>n</sub>mim][BF<sub>4</sub>]) ionic liquids, with n = 2, 4, 6, 8 and 10, was carried out as per the previously reported literature procedures.<sup>1-5</sup> First, the 1-bromoalkanes were added (in 1.2 molar ratio) to 1-methylimidazole and the reaction mixture was refluxed at 60°C to 70°C for 12 to 16 h. This reaction is called quaternisation reaction and results in the formation of 1-alkyl-3-methylimidazolium bromide ([C<sub>n</sub>mim]Br) ionic liquids. Excess of the 1-bromoalkanes was removed by repeated washing of the reaction mixture with ethyl acetate. The leftover impurities were removed with the help of

rota-vapor followed by ultrahigh vacuum treatment at 70°C for 6-8 h. The  $[C_n\text{mim}]\text{Br}$  ionic liquids thus obtained were used as intermediates to synthesize the  $[C_n\text{mim}][\text{BF}_4]$  ionic liquids via anion exchange or metathesis reaction. For this, the  $\text{Na}[\text{BF}_4]$  salt was added in 1.2 molar ratio to the  $[C_n\text{mim}]\text{Br}$  ionic liquids dissolved in DCM, which acts as solvent for the reaction. The reaction mixture was allowed to stir for about 24 h at room temperature. After the completion of reaction, excess  $\text{Na}[\text{BF}_4]$  and  $\text{NaBr}$  salts were filtered out using Büchner funnel via celite using DCM as the solvent. Subsequently, DCM and other remaining impurities were removed by rota-vapor followed by ultrahigh vacuum treatment at 60-65°C for 8-10 h.

### Characterization of the ionic liquids:

The characterization of the ionic liquids was performed with the help of  $^1\text{H}$  NMR spectroscopy. The  $^1\text{H}$  NMR spectra of the ionic liquids were recorded with the help of 200 MHz spectrometer from Bruker India Pvt. Ltd. The NMR spectra for the synthesized  $[C_n\text{mim}][\text{BF}_4]$  ionic liquids are shown in **Figure S1**.

The halide contents of the ionic liquids were estimated with the help of standard Volhard titration method using a chloride selective electrode and were found to be less than 30 ppm for all the ionic liquids.<sup>6</sup> Water contents of the ionic liquids were recorded with the help of Karl Fisher Coulometer and were found to be in the range of 200-300 ppm for all the ionic liquids.

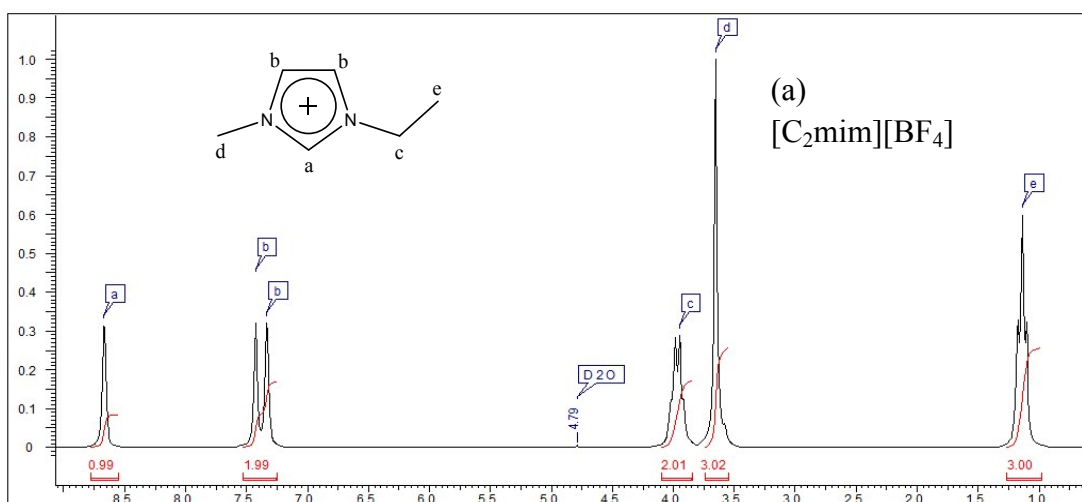

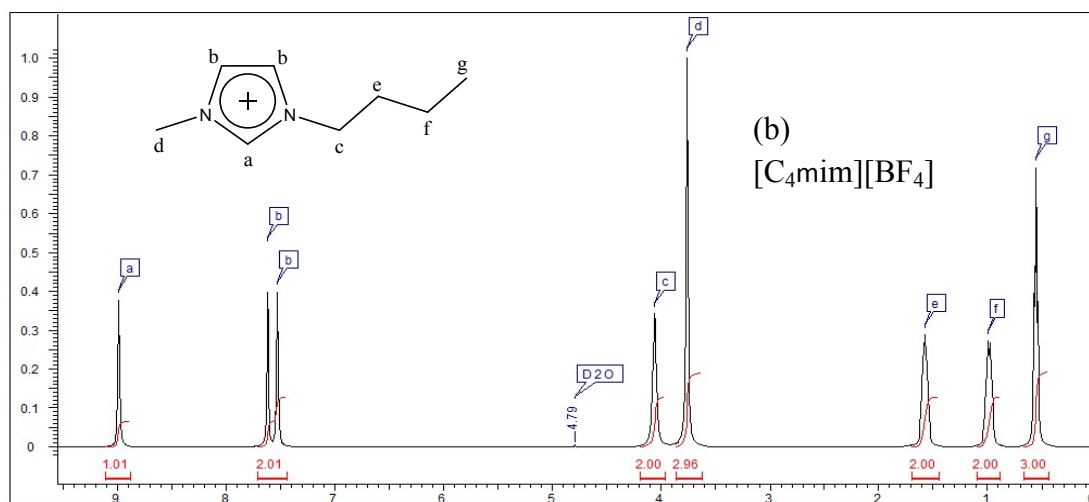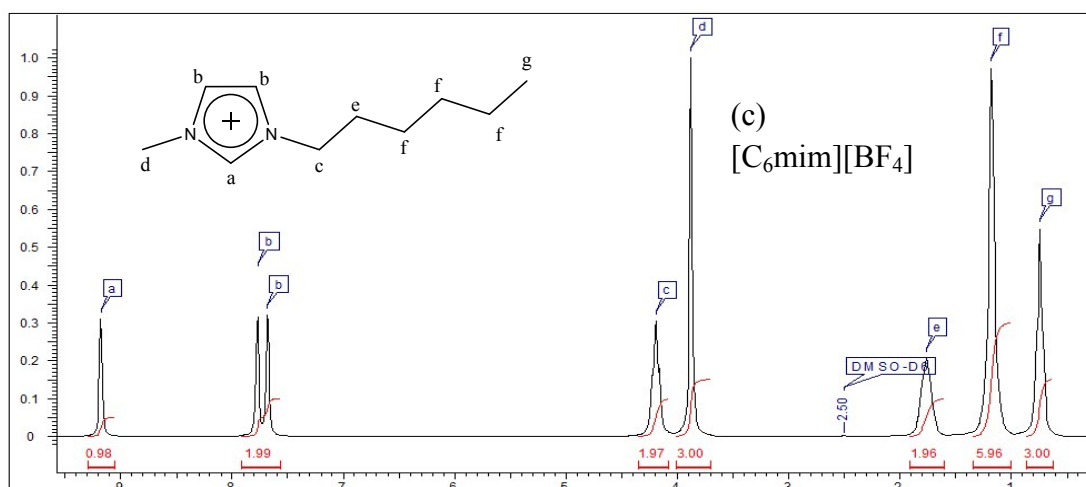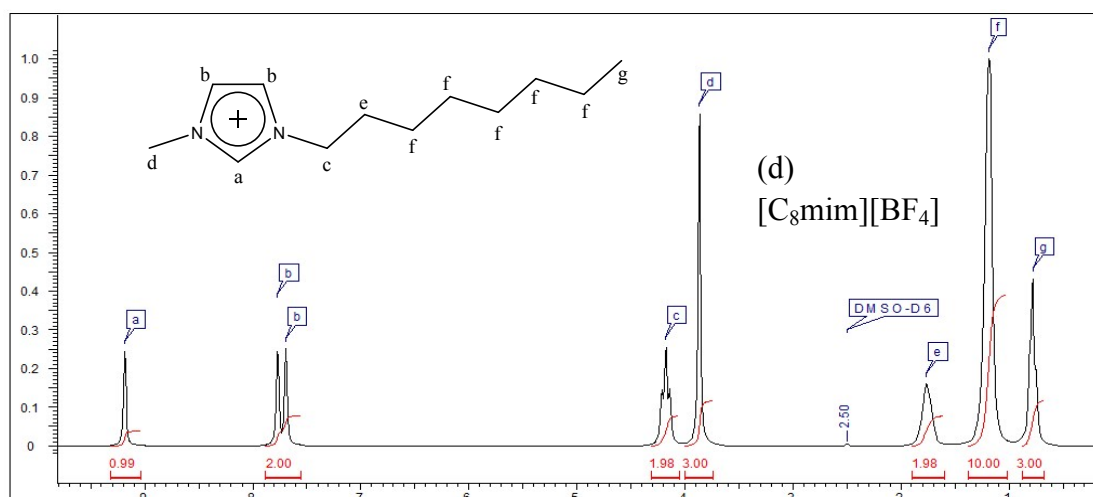

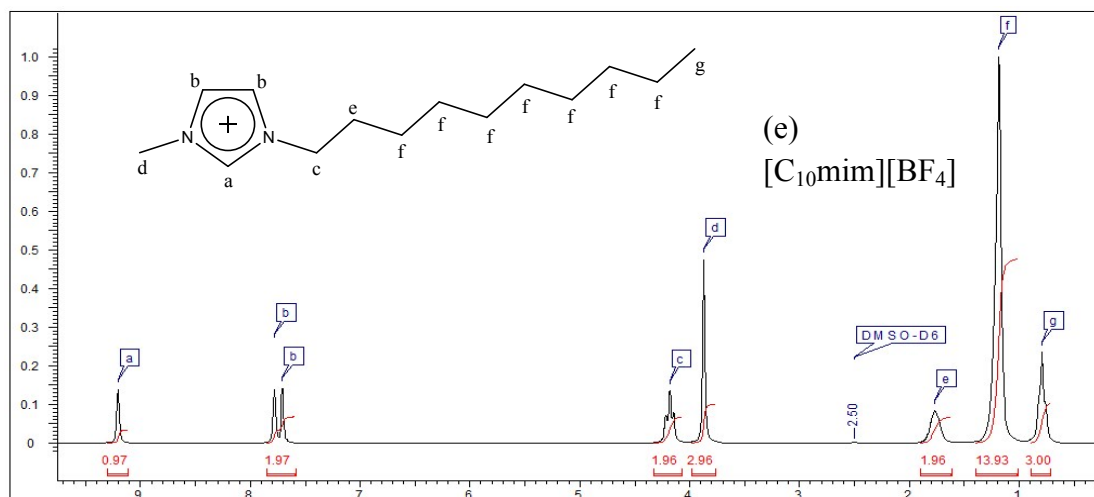

**Fig. S1.** The  $^1\text{H}$  NMR spectra of the  $[\text{C}_n\text{mim}][\text{BF}_4]$  series of the IL solvents: (a)  $[\text{C}_2\text{mim}][\text{BF}_4]$ , (b)  $[\text{C}_4\text{mim}][\text{BF}_4]$ , (c)  $[\text{C}_6\text{mim}][\text{BF}_4]$ , (d)  $[\text{C}_8\text{mim}][\text{BF}_4]$  and (e)  $[\text{C}_{10}\text{mim}][\text{BF}_4]$ .

**Table S1.** Molecular weights and densities of the studied ionic liquids.

| IL                                       | Molecular weight | Density ( $\text{g}/\text{cm}^3$ ) |
|------------------------------------------|------------------|------------------------------------|
| $[\text{C}_2\text{mim}][\text{BF}_4]$    | 197.97           | 1.294                              |
| $[\text{C}_4\text{mim}][\text{BF}_4]$    | 226.02           | 1.210                              |
| $[\text{C}_6\text{mim}][\text{BF}_4]$    | 254.08           | 1.149                              |
| $[\text{C}_8\text{mim}][\text{BF}_4]$    | 282.13           | 1.120                              |
| $[\text{C}_{10}\text{mim}][\text{BF}_4]$ | 310.18           | 1.070                              |

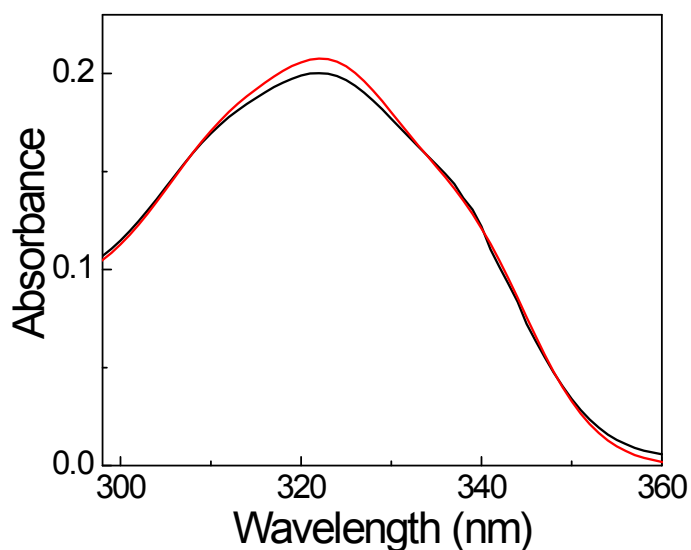

**Fig. S2.** Representative absorption spectra of 7H4MC in  $[C_8mim][BF_4]$  at  $w_0=1$  (black) and 1.2 (red).

## References

1. D. R. MacFarlane and K. R. Seddon, *Aust. J. Chem.* 2007, **60**, 3.
2. H. Ohno and M. Yoshizawa, *Solid State Ionics*, 2002, **154**, 303.
3. W. Ogiyara, T. Aoyama and H. Ohno, *Chem. Lett.* 2004, **33**, 1414.
4. P. Bonhote, A. P. Dias, N. Papageorgiou, K. Kalyanasundaram and M. Gratzel, *Inorg. Chem.* 1996, **35**, 1168.
5. W. E. Gardinier, G. A. Baker, S. N. Baker and F. V. Bright, *Macromolecules* 2005, **38**, 8574.
6. A. Stark, P. Behrend, O. Braun, A. Muller, J. Ranke, B. Ondruschka and B. Jastorff, *Green Chem.* 2008, **10**, 1152.
